# Supplementary material for: Cellular Activity of Salmonella Typhimurium ArtAB Toxin and Its Receptor-Binding Subunit
Source: MDPI journal article supplement (doi:10.3390/toxins13090599), 2021-08-27
Supplement: s1 [file s1]

# Supplementary Materials: Cellular Activity of *Salmonella* Typhimurium ArtAB Toxin and Its Receptor-Binding Subunit

Elise Overgaard, Brad Morris, Omid Mohammad Mousa, Emily Price, Adriana Rodriguez, Leyla Cufurovic, Richard S. Beard and Juliette K. Tinker

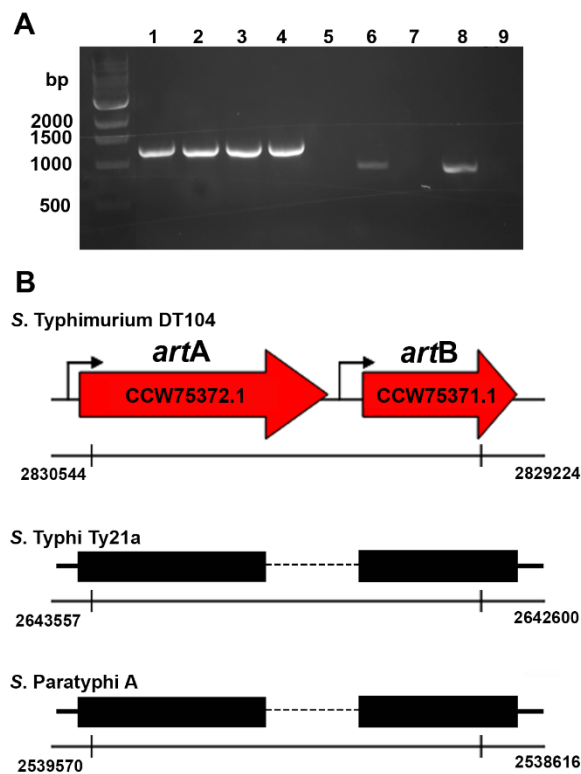

**Figure S1.** Full length and truncated *artAB* on different *Salmonella* serovars. (A) PCR of *S. enterica* serovars Typhimurium DT104 (lanes 1–4; 1320 bps), and Typhimurium non-DT104 (lane 5; no amplification), Typhi (lane 6; 957 bps), Choleraesuis (lane 7; no amplification), and Paratyphi A (lane 8; 954 bps). Lane 9, negative control. (B) Diagram of the *artA* – *artB* region in *S. Typhimurium* DT104 (NCBI HF937208), *S. Typhi* Ty21a (NCBI CP023975), and *S. Paratyphi* A (NCBI CP019185). Serovars Paratyphi, Typhi and Montevideo are positive for *artB* and a truncated version of *artA* (pseudogene) respectively.

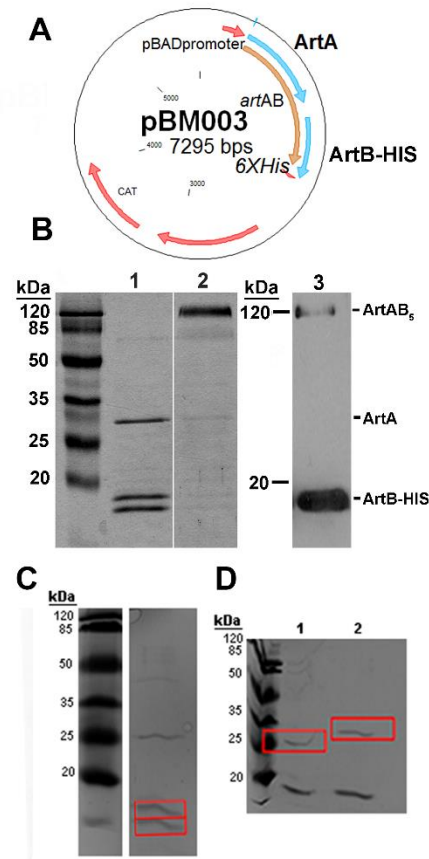

**Figure S2.** Purification of ArtABHIS from *E. coli*, and sequencing of ArtB-HIS and native ArtA. (A) plasmid pBM003 for the expression of ArtAB-HIS; (B) SDS-PAGE of: 1) purified ArtABHIS boiled and 2) purified ArtABHIS unboiled, and 3) anti-6XHis western blot of boiled ArtABHIS (ArtA  $\approx$  25.6 kDa, ArtB-HIS  $\approx$  14.2 kDa, ArtAB<sub>5</sub>-HIS  $\approx$  96.5 kDa). Bands collected for protein sequencing by mass spectrometry (LC-MS, Supplementary Table S2) included (C) ArtB-HIS (from pBM003; top band = pBM003 1, bottom band = pBM003 2) and (D) native ArtA (from pBM006; right band = pBM006 1, left band = pBM006 2).

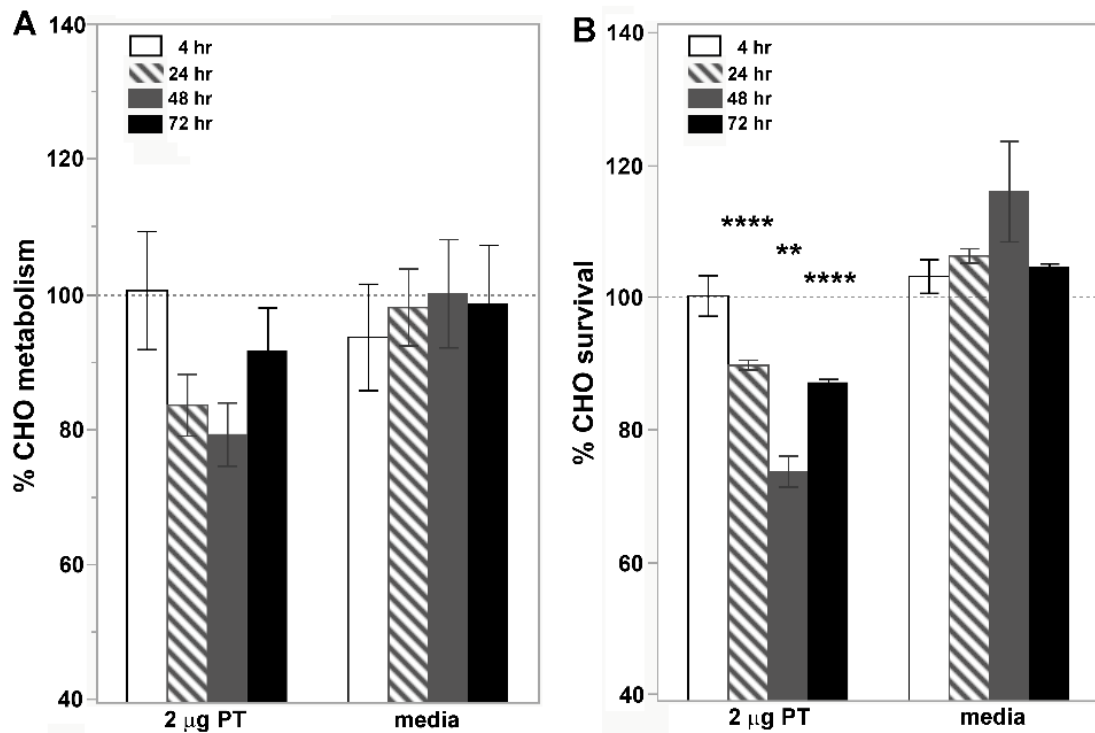

**Figure S3.** Cellular effects of PT on CHO cells. AlamarBlue™ metabolic assays (A) and crystal violet cytotoxic assays (B). PT was incubated with cells at 2 µg per 200 µL well for 4, 24, 48, or 72 hours at 37 °C. Results are reported as the percent of vehicle control and the toxin group is compared to media alone at each time point using a one-way analysis of variance (ANOVA) and Tukey-HSD. Stars above the bar indicate a significant difference from media alone at that time point (\* $p \leq 0.05$ , \*\* $p \leq 0.01$ , \*\*\* $p \leq 0.001$ , \*\*\*\* $p \leq 0.0001$ ).

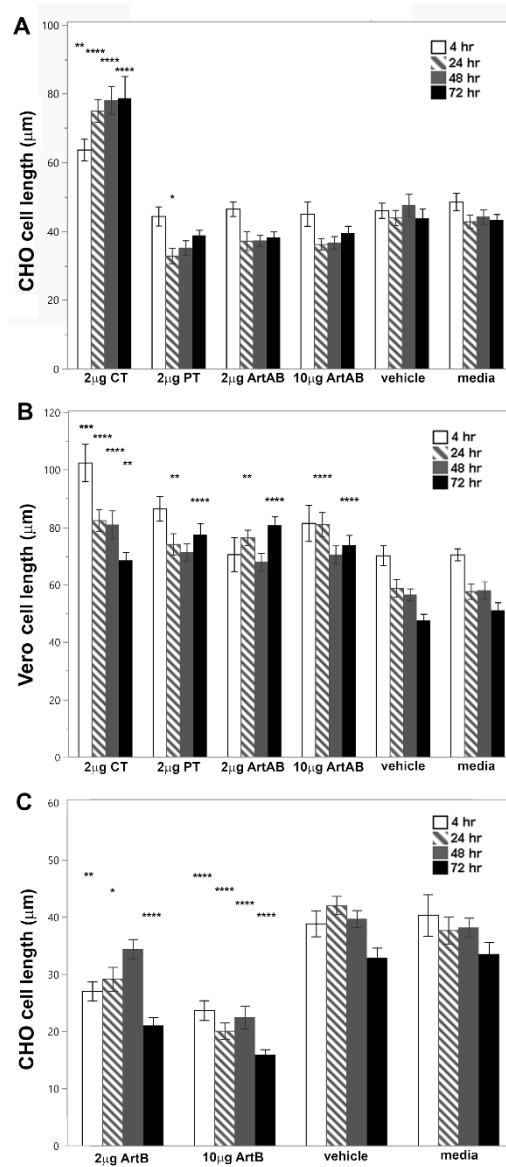

**Figure S4.** Cell length measurements. (A) cell length for CHO cells treated with ArtAB, CT and PT holotoxin, (B) cell length for Vero cells treated with ArtAB, CT and PT holotoxin and (C) cell length for CHO cells treated with ArtB subunit. Results are reported as average cell length in  $\mu\text{m}$ , and toxin groups and vehicle-treated groups are compared to media alone at each time point using a one-way analysis of variance (ANOVA) and Tukey-HSD. Stars above the bar indicate a significant difference from media alone at that time point ( $*p \leq 0.05$ ,  $**p \leq 0.01$ ,  $***p \leq 0.001$ ,  $****p \leq 0.0001$ ).

**Table S1.** Protein accession numbers for phylogenetic analysis.

| Toxin A subunits                            | NCBI Accession # | Toxin B subunits                 | NCBI Accession# |
|---------------------------------------------|------------------|----------------------------------|-----------------|
| ArtA <i>S. Typhimurium</i> DT104            | WP_156015302     | ArtB <i>S. Typhimurium</i> DT104 | 5WHU_A          |
| ArtA <i>S. Worthington</i>                  | BAX76679.1       | ArtB <i>S. Worthington</i>       | BAX76680        |
| ArtA <i>S. bongori</i>                      | ASG55211.1       | ArtB <i>S. Typhi</i>             | AE014613.1      |
| ArtA <i>S. Typhi</i> /Montevideo pseudogene | AAMFER010000002  | SubB2 <i>E. coli</i>             | WP_169004307    |
| PltA <i>S. Typhi</i>                        | AE014613.1       | ArtB <i>S. bongori</i>           | BAX76684        |
| PltA/ArtA <i>E. coli</i>                    | WP_001355271     | SalB <i>S. arizonae</i>          | ABX22253.1      |
| PtxA S1 <i>B. pertussis</i>                 | WP_019248344     | PltB <i>S. Typhi</i>             | AE014613.1      |
| YtxA <i>Y. enterocolitica</i>               | WP_023161032     | PtxB S2 <i>B. pertussis</i>      | WP_050830703    |
| LtIIa <i>E. coli</i>                        | TFY48810         | YrpB <i>Y. pestis</i>            | WP_002209112    |
| LTIIB <i>E. coli</i>                        | 1TII_A           | SubB <i>E. coli</i>              | Q6EZC3          |
| EltA (LTA1) <i>E. coli</i>                  | WP_001398470     | CfxB <i>C. freundii</i>          | BAC16522        |
| CtxA <i>V. cholerae</i>                     | 1001196A         | EcxB <i>E. coli</i>              | EEU4199622      |
| SubA <i>E. coli</i>                         | WP_000912970     | CtxB <i>V. cholerae</i>          | WP_000593522    |
| CfxA <i>C. freundii</i>                     | BAC16521.1       | EltB <i>E. coli</i>              | WP_024167713    |
| EcxA <i>E. coli</i>                         | WP_071999469     | LTIIB <i>E. coli</i>             | KDA69244        |
| CdtB <i>S. Typhi</i>                        | NC_003198        | LTIIB <i>E. coli</i>             | WP_096985491    |
| YrpA <i>Y. pestis</i>                       | WP_064516147     | YtxB <i>Y. enterocolitica</i>    | WP_050137877    |
| ArtA <i>E. coli</i>                         | WP_077887430     | Stx2B <i>E. coli</i>             | EEV2598235      |
| Stx1A <i>E. coli</i>                        | WP_000691354     | Stx1B <i>E. coli</i>             | WP_097586066    |
| Stx2A <i>E. coli</i>                        | EEV2155635.1     |                                  |                 |

**Table S2.** LC-MS sequencing of purified proteins.

| Protein  | Accession | Description                                                                                                                 | Coverage [%] | # Peptides | # PSMs | # Unique Peptides | # Protein Groups | # AAs | MW [kDa] | calc. pI | Score Sequest HT: Sequest HT | # Peptides (by Search Engine): Sequest HT |
|----------|-----------|-----------------------------------------------------------------------------------------------------------------------------|--------------|------------|--------|-------------------|------------------|-------|----------|----------|------------------------------|-------------------------------------------|
| pBM003 1 | Q404H3    | ArtB protein<br>OS= <i>Salmonella enterica</i> subsp. enterica serovar Typhimurium str. DT104                               | 48           | 12         | 318    | 12                | 1                | 141   | 15.8     | 8.05     | 1047.44                      | 12                                        |
| pBM003 2 | Q404H3    | ArtB protein<br>OS= <i>Salmonella enterica</i> subsp. enterica serovar Typhimurium str. DT104                               | 48           | 10         | 236    | 10                | 1                | 141   | 15.8     | 8.05     | 812.33                       | 10                                        |
| pBM006 1 | Q404H4    | ArtA protein<br>OS= <i>Salmonella enterica</i> subsp. enterica serovar Typhimurium str. DT104                               | 59           | 13         | 317    | 13                | 1                | 241   | 27.6     | 8.7      | 1488.67                      | 13                                        |
| pBM006 2 | Q404H4    | ArtA protein<br>OS= <i>Salmonella enterica</i> subsp. enterica serovar Typhimurium str. DT104                               | 58           | 13         | 496    | 13                | 1                | 241   | 27.6     | 8.7      | 2323.94                      | 13                                        |
| pLC001   | Q404H3    | ArtB protein<br>OS= <i>Salmonella enterica</i> subsp. enterica serovar Typhimurium str. DT104<br>OX=85569 GN=ArtB PE=1 SV=1 | 40           | 7          | 60     | 7                 | 1                | 141   | 15.8     | 8.05     | 184.77                       | 7                                         |
